# Supplementary material for: Effects of Poplar Ecological Retreat on Habitat Suitability for Migratory Birds in China’s Dongting Lake Wetland
Source: Frontiers journal article supplement (doi:10.3389/fenvs.2021.793005), 2022-01-20
Supplement: Data_Sheet_1.PDF [file Data_Sheet_1.PDF]

# **Effects of Poplar Ecological Retreat on habitat suitability for migratory birds in China's Dongting Lake wetland**

## **Running head: Impacts of wetland restoration on migrant birds**

Xinyu Qu <sup>a, c</sup>, Chunyan Du <sup>a, b, c</sup>, Haipeng Wu <sup>a, b, c</sup>\*, Ying Xiong <sup>a, b, c</sup>, Guanlong Yu <sup>a, b, c</sup>, Jiasheng Wang <sup>d</sup>, Juan Dai <sup>d</sup>, Lixue Wu <sup>a, c</sup>, Zhuo Zhang <sup>a, b</sup>, Yuqian Zhu <sup>a, c</sup>, Jingdu Liu <sup>a, c</sup>

<sup>a</sup> School of Hydraulic Engineering, Changsha University of Science & Technology, Changsha 410114, China

<sup>b</sup> Key Laboratory of Dongting Lake Aquatic Eco-Environmental Control and Restoration of Hunan Province, Changsha 410114, China

<sup>c</sup> Engineering and Technical Center of Hunan Provincial Environmental Protection for River-Lake Dredging Pollution Control, Changsha 410114, China

<sup>d</sup> Changjiang River Scientific Research Institute, Wuhan 430072, China

\* Corresponding authors: wuhaipeng0701@126.com (H. Wu).

Table S1 Landsat images used in this study. Hydrologic year: from April to next March.

| Hydrologic year | Date       | Path/Row | Sensor |
|-----------------|------------|----------|--------|
| 2014            | 2014/12/17 | 123/40   | ETM+   |
|                 | 2014/12/8  | 124/40   | ETM+   |
| 2015            | 2016/2/6   | 123/40   | ETM+   |
|                 | 2016/2/5   | 124/40   | OLI    |
| 2016            | 2016/11/28 | 123/40   | OLI    |
|                 | 2016/12/5  | 124/40   | OLI    |
| 2017            | 2017/12/17 | 123/40   | OLI    |
|                 | 2018/1/9   | 124/40   | OLI    |
| 2018            | 2018/11/26 | 123/40   | ETM+   |
|                 | 2018/11/25 | 124/40   | OLI    |
| 2019            | 2020/2/9   | 123/40   | OLI    |
|                 | 2020/1/31  | 124/40   | OLI    |

Table S2 The weight of each factor for evaluate the habitat suitability of different migratory birds (Wu et al., 2019; Tang et al., 2016). Habitat variables include environmental variables (land cover type, altitude and slope) and human disturbances (distance to residential area and distance to road).

| Birds        | Habitat variable              | Analytic hierarchy process (AHP) |                              |                        |   |                        |                 |          | Entropy weight method |        | General weights |        |       |
|--------------|-------------------------------|----------------------------------|------------------------------|------------------------|---|------------------------|-----------------|----------|-----------------------|--------|-----------------|--------|-------|
|              |                               | Rule layer                       | Scheme layer                 |                        |   |                        | AHP weight      | Entropy  | Entropy weight        |        |                 |        |       |
|              |                               |                                  | Human disturbance            | Environmental variable |   |                        |                 |          |                       |        |                 |        |       |
| Anatidae     | Land cover type               | Human disturbance                | Distance to road             | 1                      | 1 | Environmental variable | Land cover type | Altitude | Slope                 | 0.3690 | 0.9832          | 0.7079 | 0.538 |
|              | Altitude                      |                                  |                              |                        |   | Land cover type        | 1               | 7        | 5                     | 0.0472 | 0.9974          | 0.1089 | 0.078 |
|              | Slope                         |                                  |                              |                        |   |                        |                 |          |                       | 0.0838 | 0.9979          | 0.0892 | 0.087 |
|              | Distance to residential areas |                                  |                              |                        |   |                        |                 |          |                       | 0.2500 | 0.9989          | 0.0473 | 0.149 |
|              | Distance to road              |                                  |                              |                        |   |                        |                 |          |                       | 0.2500 | 0.9989          | 0.0466 | 0.148 |
| Charadriidae | Land cover type               | Environmental variable           | Distance to residential area | 1                      | 1 | Environmental variable | Land cover type | Altitude | Slope                 | 0.3889 | 0.9788          | 0.7538 | 0.571 |
|              | Altitude                      |                                  |                              |                        |   | Land cover type        | 1               | 7        | 7                     | 0.0556 | 0.9974          | 0.0918 | 0.074 |
|              | Slope                         |                                  |                              |                        |   |                        |                 |          |                       | 0.0556 | 0.9979          | 0.0752 | 0.065 |
|              | Distance to residential areas |                                  |                              |                        |   |                        |                 |          |                       | 0.2500 | 0.9989          | 0.0399 | 0.145 |
|              | Distance to road              |                                  |                              |                        |   |                        |                 |          |                       | 0.2500 | 0.9989          | 0.0393 | 0.145 |
| Ardeidae     | Land cover type               | Habitat variable                 | Distance to residential area | 1                      | 1 | Environmental variable | Land cover type | Altitude | Slope                 | 0.3989 | 0.9855          | 0.6767 | 0.538 |
|              | Altitude                      |                                  |                              |                        |   | Land cover type        | 1               | 9        | 7                     | 0.0484 | 0.9974          | 0.1206 | 0.084 |
|              | Slope                         |                                  |                              |                        |   |                        |                 |          |                       | 0.0527 | 0.9979          | 0.0987 | 0.076 |
|              | Distance to residential areas |                                  |                              |                        |   |                        |                 |          |                       | 0.2500 | 0.9989          | 0.0524 | 0.151 |
|              | Distance to road              |                                  |                              |                        |   |                        |                 |          |                       | 0.2500 | 0.9989          | 0.0516 | 0.151 |
| Laridae      | Land cover type               | Habitat variable                 | Distance to residential area | 1                      | 1 | Environmental variable | Land cover type | Altitude | Slope                 | 0.4091 | 0.9841          | 0.6962 | 0.553 |
|              | Altitude                      |                                  |                              |                        |   | Land cover type        | 1               | 9        | 9                     | 0.0455 | 0.9974          | 0.1133 | 0.079 |
|              | Slope                         |                                  |                              |                        |   |                        |                 |          |                       | 0.0455 | 0.9979          | 0.0928 | 0.069 |
|              | Distance to residential areas |                                  |                              |                        |   |                        |                 |          |                       | 0.2500 | 0.9989          | 0.0493 | 0.15  |
|              | Distance to road              |                                  |                              |                        |   |                        |                 |          |                       | 0.2500 | 0.9989          | 0.0485 | 0.149 |

Table S3 Correlation Coefficient between Each Index of the HL (S-DL) and their polar area.

| Birds        | Grade      | HL                            |                               |                               | S-DL                          |                              |                         |
|--------------|------------|-------------------------------|-------------------------------|-------------------------------|-------------------------------|------------------------------|-------------------------|
|              |            | TA                            | LPI                           | MPS                           | TA                            | LPI                          | MPS                     |
| Anatidae     | Poorly     | -0.789 <sup>0.062</sup>       | 0.144 <sup>0.785</sup>        | 0.258 <sup>0.622</sup>        | 0.426 <sup>0.400</sup>        | 0.630 <sup>0.180</sup>       | 0.531 <sup>0.278</sup>  |
|              | Generally  | -0.166 <sup>0.753</sup>       | -0.324 <sup>0.532</sup>       | -0.376 <sup>0.462</sup>       | <b>0.906<sup>0.013</sup></b>  | 0.322 <sup>0.534</sup>       | 0.483 <sup>0.332</sup>  |
|              | Moderately | 0.244 <sup>0.641</sup>        | 0.192 <sup>0.715</sup>        | -0.199 <sup>0.705</sup>       | <b>-0.895<sup>0.016</sup></b> | 0.056 <sup>0.916</sup>       | 0.142 <sup>0.789</sup>  |
|              | Highly     | -0.148 <sup>0.780</sup>       | -0.429 <sup>0.396</sup>       | -0.068 <sup>0.898</sup>       | -0.351 <sup>0.495</sup>       | -0.093 <sup>0.861</sup>      | -0.296 <sup>0.569</sup> |
| Charadriidae | Poorly     | 0.281 <sup>0.590</sup>        | -0.781 <sup>0.067</sup>       | -0.275 <sup>0.598</sup>       | -0.577 <sup>0.231</sup>       | 0.697 <sup>0.123</sup>       | -0.383 <sup>0.454</sup> |
|              | Generally  | -0.083 <sup>0.876</sup>       | -0.359 <sup>0.484</sup>       | -0.371 <sup>0.469</sup>       | -0.009 <sup>0.986</sup>       | 0.009 <sup>0.987</sup>       | -0.241 <sup>0.646</sup> |
|              | Moderately | 0.259 <sup>0.620</sup>        | 0.387 <sup>0.449</sup>        | -0.203 <sup>0.700</sup>       | -0.064 <sup>0.904</sup>       | 0.107 <sup>0.840</sup>       | -0.456 <sup>0.363</sup> |
|              | Highly     | -0.115 <sup>0.828</sup>       | -0.619 <sup>0.190</sup>       | <b>-0.872<sup>0.023</sup></b> | 0.200 <sup>0.704</sup>        | 0.313 <sup>0.546</sup>       | -0.171 <sup>0.747</sup> |
| Ardeidae     | Poorly     | -0.037 <sup>0.945</sup>       | -0.410 <sup>0.420</sup>       | -0.062 <sup>0.906</sup>       | 0.231 <sup>0.660</sup>        | <b>0.893<sup>0.017</sup></b> | 0.483 <sup>0.332</sup>  |
|              | Generally  | -0.050 <sup>0.924</sup>       | -0.277 <sup>0.595</sup>       | -0.645 <sup>0.167</sup>       | <b>0.859<sup>0.029</sup></b>  | 0.114 <sup>0.830</sup>       | 0.542 <sup>0.267</sup>  |
|              | Moderately | -0.415 <sup>0.414</sup>       | 0.132 <sup>0.804</sup>        | -0.033 <sup>0.950</sup>       | <b>-0.851<sup>0.032</sup></b> | -0.304 <sup>0.557</sup>      | -0.267 <sup>0.608</sup> |
|              | Highly     | 0.248 <sup>0.636</sup>        | 0.348 <sup>0.499</sup>        | 0.162 <sup>0.759</sup>        | -0.050 <sup>0.925</sup>       | 0.107 <sup>0.841</sup>       | -0.593 <sup>0.215</sup> |
| Laridae      | Poorly     | <b>-0.889<sup>0.018</sup></b> | <b>-0.838<sup>0.037</sup></b> | <b>-0.811<sup>0.050</sup></b> | -0.789 <sup>0.062</sup>       | -0.305 <sup>0.557</sup>      | 0.332 <sup>0.520</sup>  |
|              | Generally  | -0.125 <sup>0.813</sup>       | 0.372 <sup>0.468</sup>        | 0.174 <sup>0.741</sup>        | 0.133 <sup>0.801</sup>        | 0.578 <sup>0.230</sup>       | 0.404 <sup>0.428</sup>  |
|              | Moderately | -0.388 <sup>0.448</sup>       | -0.801 <sup>0.056</sup>       | -0.063 <sup>0.905</sup>       | -0.597 <sup>0.211</sup>       | -0.185 <sup>0.725</sup>      | 0.064 <sup>0.905</sup>  |
|              | Highly     | 0.488 <sup>0.326</sup>        | 0.462 <sup>0.356</sup>        | -0.181 <sup>0.732</sup>       | 0.352 <sup>0.493</sup>        | 0.306 <sup>0.555</sup>       | 0.018 <sup>0.973</sup>  |

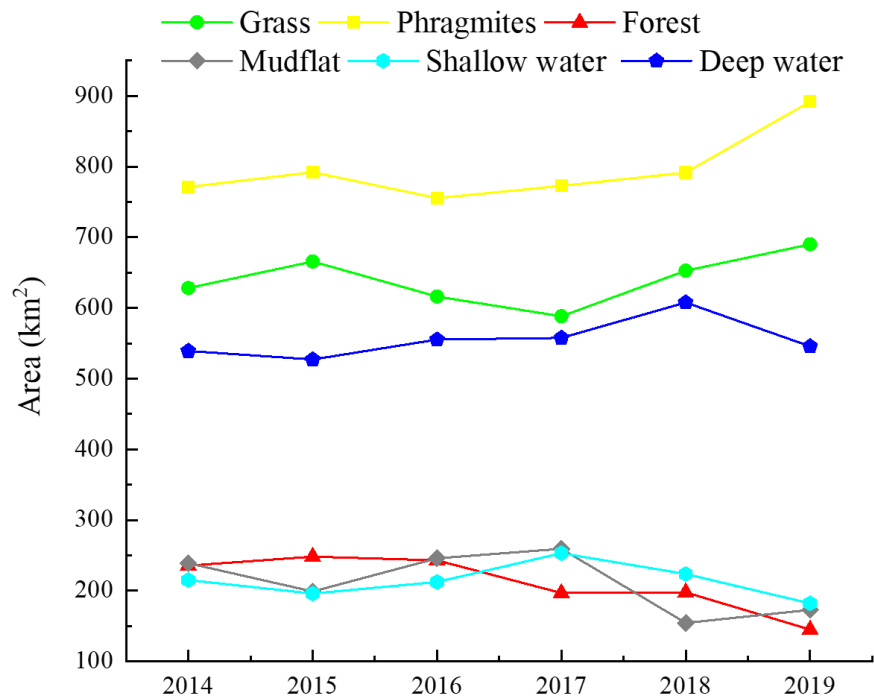

Fig. S1 Area dynamics of different land cover types in DL.

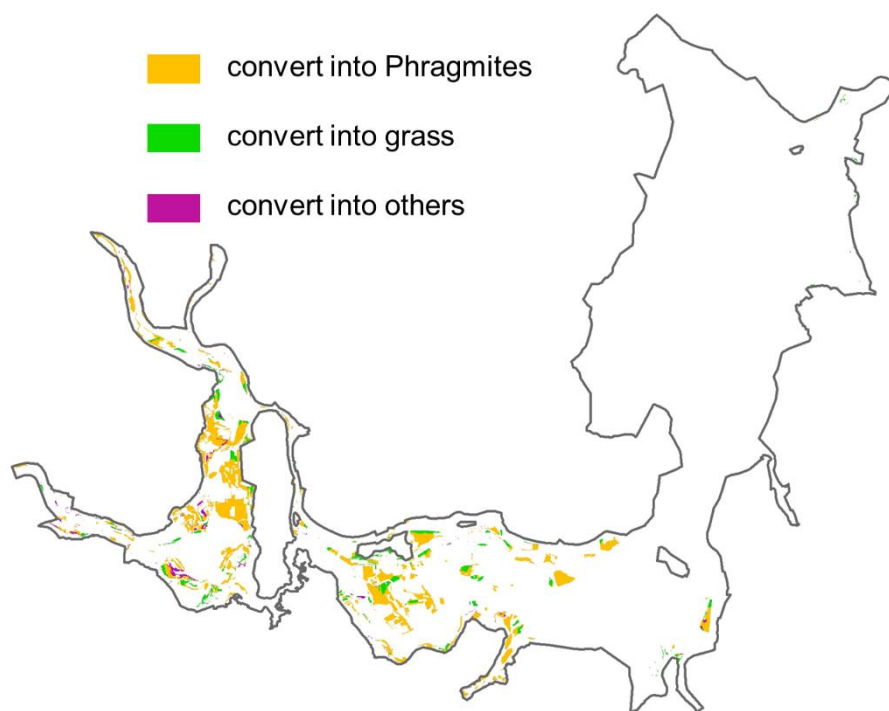

Fig. S2 Transformation of land cover in PER region.

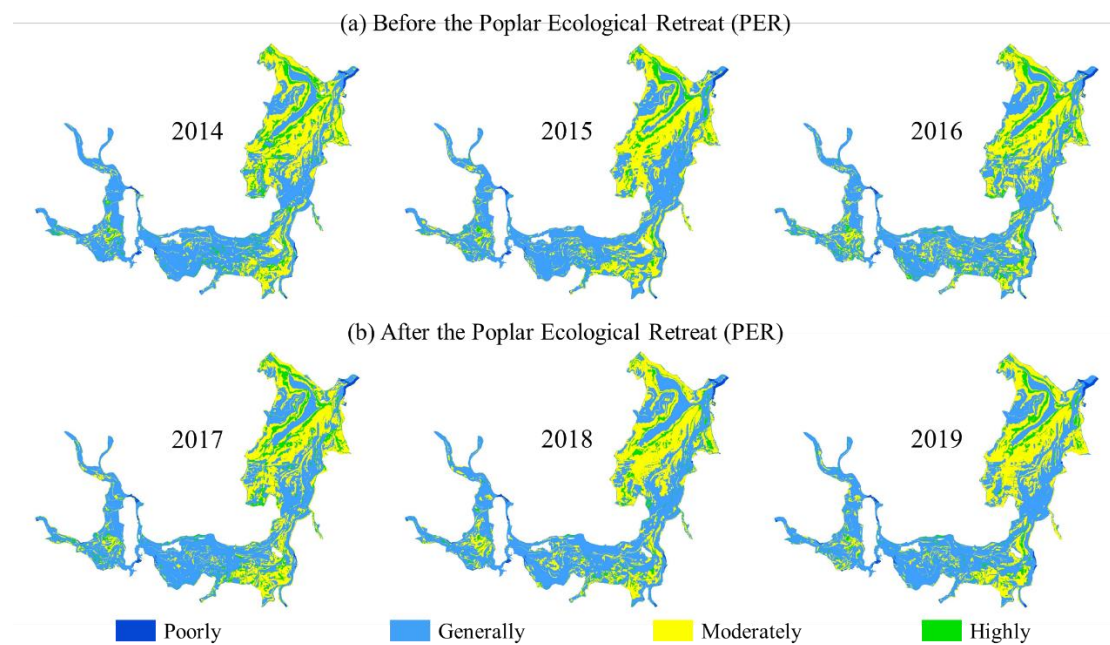

Fig. S3 The habitat suitability maps for Charadriidae of (a) before PER (b) after PER.

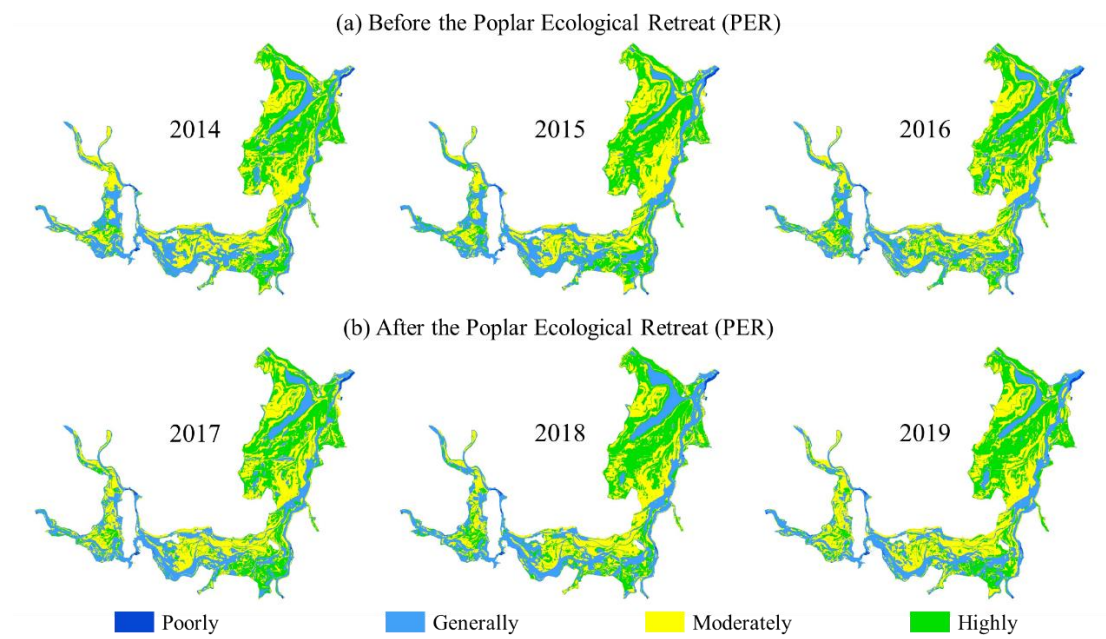

Fig. S4 The habitat suitability maps for Ardeidae of (a) before PER (b) after PER.

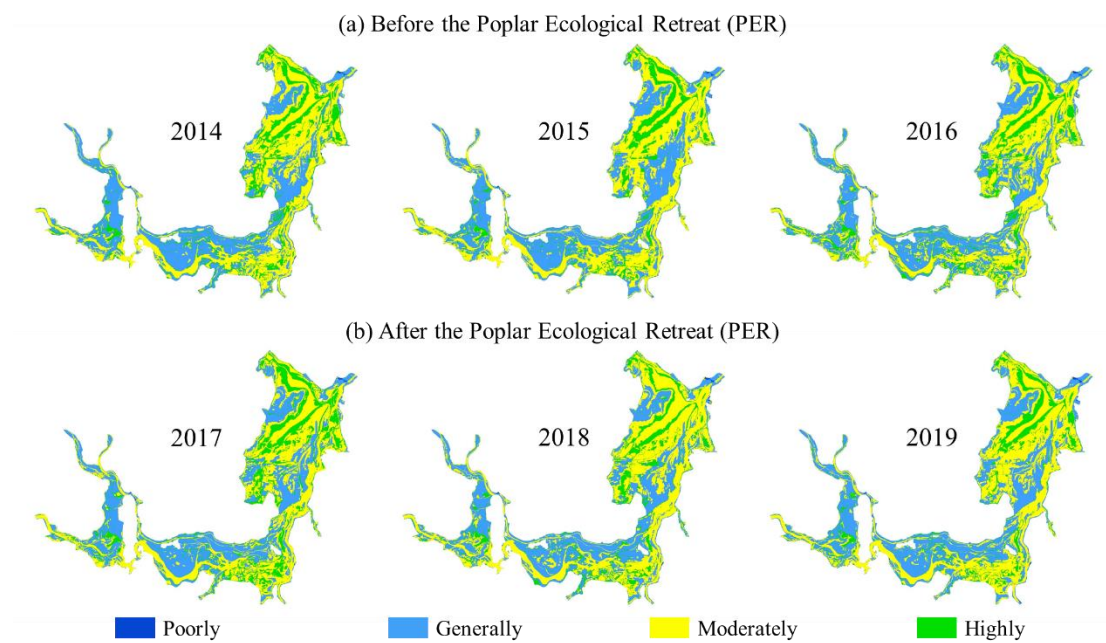

Fig. S5 The habitat suitability maps for Laridae of (a) before PER (b) after PER.

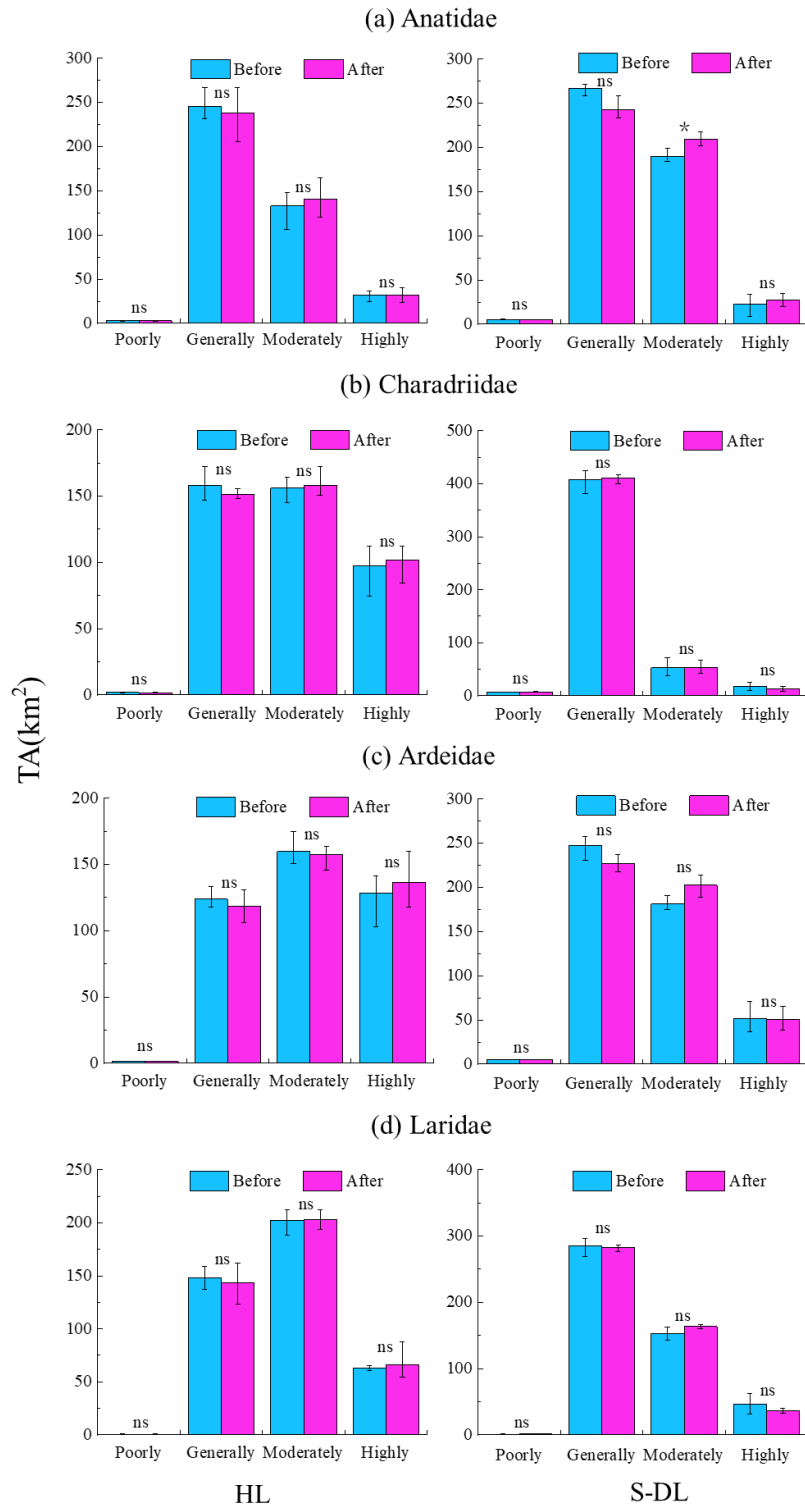

Fig. S6 The TA (total area) of each grade of habitat suitability for (a) Anatidae, (b) Charadriidae, (c) Ardeidae and (d) Laridae of before PER and after PER in HL and S-DL respectively. Error bars around the mean represent the maximum and minimum values of this group of data respectively.

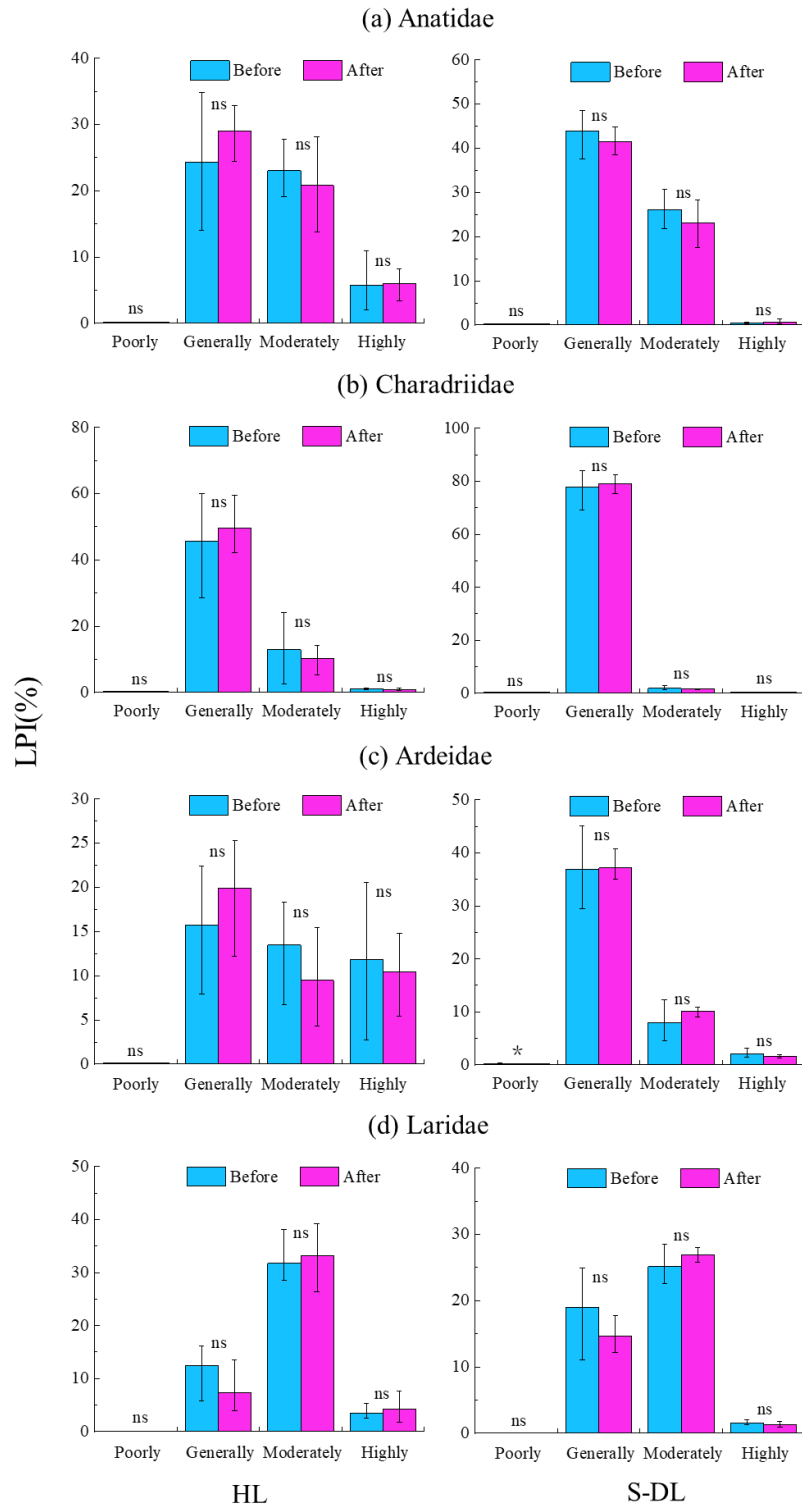

Figure. S7 The LPI (Largest patch index) of each grade of habitat suitability for (a) Anatidae, (b) Charadriidae, (c) Ardeidae and (d) Laridae of before PER and after PER in HL and S-DL respectively. Error bars around the mean represent the maximum and minimum values of this group of data respectively.



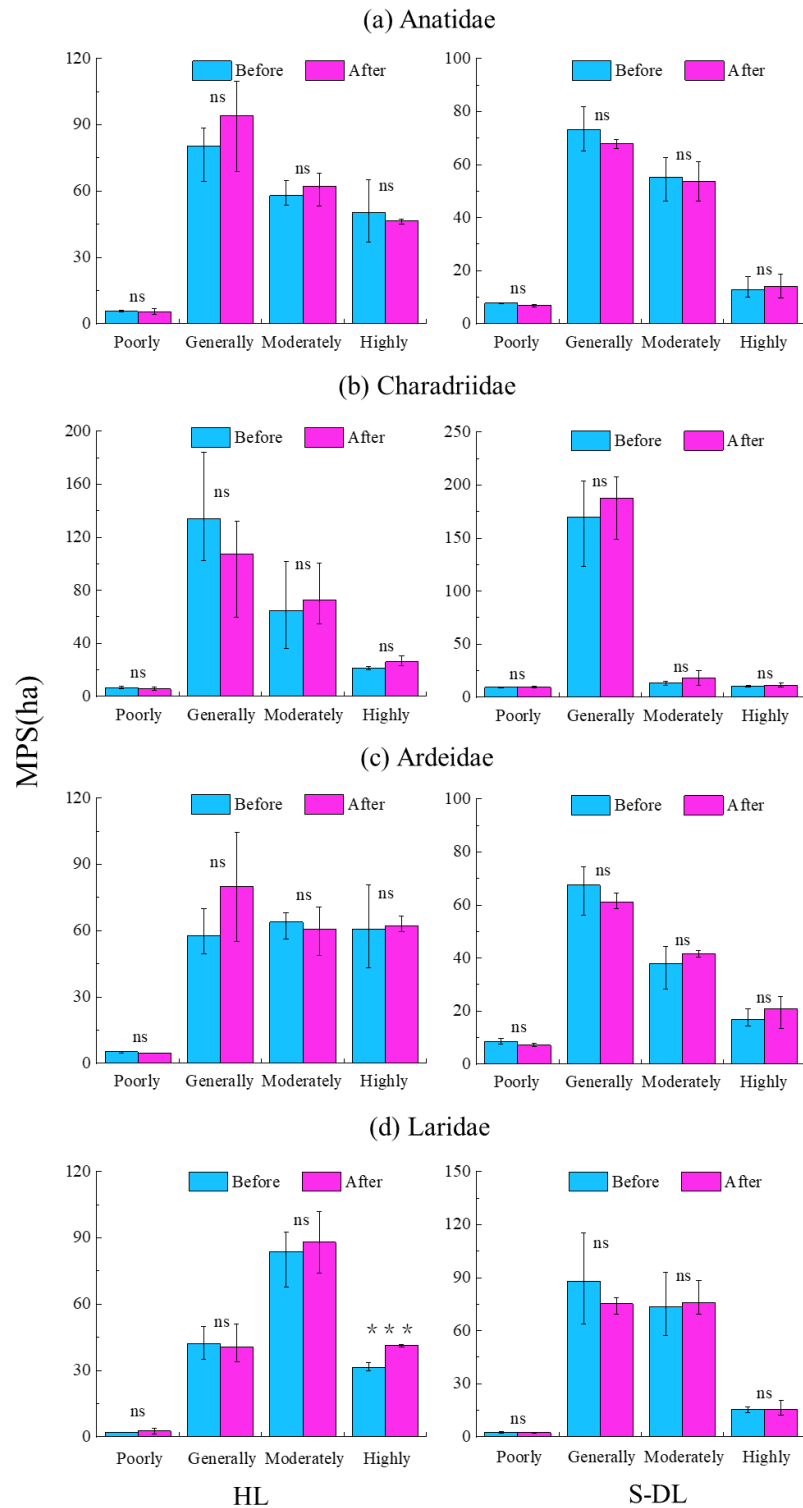

Fig. S8 The MPS (Mean patch size) of each grade of habitat suitability for (a) Anatidae, (b) Charadriidae, (c) Ardeidae and (d) Laridae of before PER and after PER in HL and S-DL respectively. Error bars around the mean represent the maximum and minimum values of this group of data respectively.

## References

- Tang, X., Li, H., Xu, X., Yang, G., Liu, G., Li, X., and Chen, D. (2016). Changing land use and its impact on the habitat suitability for wintering Anseriformes in China's Poyang Lake region. *Sci. Total Environ.* 557, 296-306. doi: 10.1016/j.scitotenv.2016.03.108.
- Tian, B., Zhou, Y., Zhang, L., Ma, Z., Yang, B., and Tang, C. (2008). A GIS and remote sensing-based analysis of migratory bird habitat suitability for Chongming Dongtan Nature Reserve, Shanghai. *Acta Ecologica Sinica*. 28(7), 3049-3059.
- Wu, H. P., Chen, J., Zeng, G. M., Xu, J. J., Sang, L. H., Liu, Q., Dai, J., Xiong, W. P., Yuan, Z., Wang, Y. Q., and Ye, S. J. (2019). Effects of Early Dry Season on Habitat Suitability for Migratory Birds in China's Two Largest Freshwater Lake Wetlands after the Impoundment of Three Gorges Dam. *J. Environ. Inform.* doi: 10.3808/jei.201900411.
